# Supplementary material
Source: Research Square preprint supplement (doi:10.21203/rs.3.rs-9200044/v1)
Supplement: Supplementary file 2 [file 2a91c73ef5acb6b5756b3668.docx]

**SUPPLEMENTARY MATERIALS**

**Title: Development of a multidomain neuromuscular aging clock integrating neurosensory dysfunction with molecular biomarkers**

**Authors:** Apurba Kumar Ganguly, Ph.D.*, Sudip Kumar Banerjee, Ph.D. Vidya Sagar GV, MD, Ph.D. Dinesh Kumar Singal, MD. and Anondeep Ganguly, PGDH.

*** Corresponding Author:** Apurba Kumar Ganguly, Ph.D.; Address: 7, Panditya Place, Kolkata-700029, India; Tel: +919830389616; Email: apurbaganguly15@gmail.com.

**Journal:** Aging Clinical and Experimental Research

**Supplementary Table S1. Diagnostic accuracy of clinical neurosensory dysfunction parameters**

ROC analysis demonstrated excellent discriminatory performance of clinical neurosensory dysfunction parameters in distinguishing symptomatic individuals from healthy controls. Nociceptive pain burden parameters showed particularly strong diagnostic performance, with pain intensity achieving the highest area under the curve (AUC = 0.989). Neuropathic sensory dysfunction and thermal sensory alterations also demonstrated high accuracy, with AUC values ranging from 0.952 to 0.980. These findings indicate that clinically observable neurosensory symptoms provide robust indicators of neuromuscular dysfunction and contribute significantly to the composite neuromuscular dysfunction index.

| **Parameter** | **AUC (95%CI)** | **Youden's Index (%)** | **Sensitivity (%)** | **Specificity (%)** | **PPV (%)** | **NPV (%)** | **Accuracy (%)** | **Cut off value** |
| --- | --- | --- | --- | --- | --- | --- | --- | --- |
| **Nociceptive Pain Burden (NPB)** | | | | | | | | |
| **Intensityof pain** | 0.989 (0.97 to 1.00) | 93.52 | 98.15 | 95.37 | 97.17 | 95.45 | 96.3 | 1 |
| **Surface pain** | 0.983 (0.97 to 1.00) | 91.67 | 98.15 | 93.52 | 96.26 | 95.41 | 95.83 | 1 |
| **Deep pain** | 0.959 (0.93 to 0.98) | 85.19 | 94.44 | 90.74 | 93.27 | 90.18 | 91.67 | 1 |
| **Neuropathic Sensory Dysfunction (NSD)** | | | | | | | | |
| **Tringling/Pricking** | 0.952 (0.92 to 0.98) | 78.7 | 94.44 | 84.26 | 89.72 | 88.99 | 89.35 | 1 |
| **Sharpness** | 0.969 (0.94 to 0.99) | 86.11 | 94.44 | 91.67 | 93.14 | 88.6 | 90.74 | 1 |
| **Dullness** | 0.980 (0.96 to 0.99) | 85.19 | 88.89 | 96.3 | 100 | 66.25 | 74.07 | 2 |
| **Thermal Sensory Alteration (TSA)** | | | | | | | | |
| **Hot/Burning** | 0.976 (0.95-0.99) | 84.26 | 90.74 | 93.52 | 100 | 68.42 | 75.93 | 2 |
| **Cold** | 0.967 (0.94 to 0.99) | 81.48 | 90.74 | 90.74 | 100 | 76.52 | 82.41 | 2 |
| **Neurogenic Irritation Response (NIR)** | | | | | | | | |
| **Itching** | 0.980 (0.96 to 0.99) | 82.41 | 96.3 | 86.11 | 93.07 | 87.83 | 90.28 | 1 |

Footnote: AUC indicates area under the ROC curve; PPV, positive predictive value; NPV, negative predictive value. Optimal cut-off values were determined using the Youden index
