# Supplementary material
Source: Research Square preprint supplement (doi:10.21203/rs.3.rs-9200044/v1)
Supplement: Supplementary file 3 [file 2f19ce42494e68c55c2da73a.docx]

**SUPPLEMENTARY MATERIALS**

**Title: Development of a multidomain neuromuscular aging clock integrating neurosensory dysfunction with molecular biomarkers**

**Authors:** Apurba Kumar Ganguly, Ph.D.*, Sudip Kumar Banerjee, Ph.D. Vidya Sagar GV, MD, Ph.D. Dinesh Kumar Singal, MD. and Anondeep Ganguly, PGDH.

*** Corresponding Author:** Apurba Kumar Ganguly, Ph.D.; Address: 7, Panditya Place, Kolkata-700029, India; Tel: +919830389616; Email: apurbaganguly15@gmail.com.

**Journal:** Aging Clinical and Experimental Research

**Supplementary Figure S3. Forest plots of standardized mean differences**


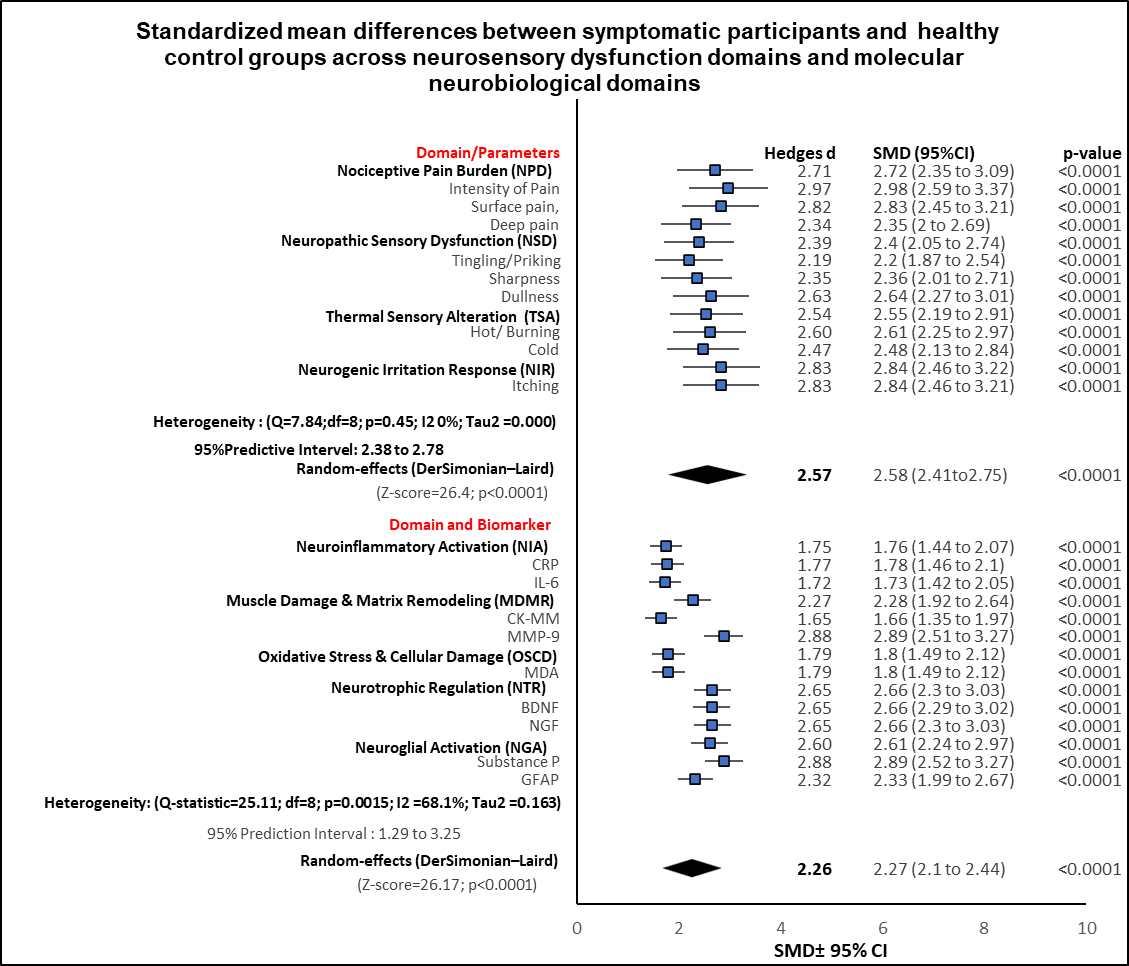


(A) Clinical neurosensory dysfunction domains. (B) Molecular neurobiological biomarker domains. Standardized mean differences (Hedges' g) with 95% confidence intervals comparing symptomatic participants (n = 108) and healthy controls (n = 108). Pooled estimates derived using random-effects (DerSimonian–Laird) meta-analysis. Heterogeneity assessed using I² statistic.
