# Supplementary material
Source: Research Square preprint supplement (doi:10.21203/rs.3.rs-9200044/v1)

**SUPPLEMENTARY MATERIALS**

**Title: Development of a multidomain neuromuscular aging clock integrating neurosensory dysfunction with molecular biomarkers**

**Authors:** Apurba Kumar Ganguly, Ph.D.*, Sudip Kumar Banerjee, Ph.D. Vidya Sagar GV, MD, Ph.D. Dinesh Kumar Singal, MD. and Anondeep Ganguly, PGDH.

*** Corresponding Author:** Apurba Kumar Ganguly, Ph.D.; Address: 7, Panditya Place, Kolkata-700029, India; Tel: +919830389616; Email: apurbaganguly15@gmail.com.

**Journal:** Aging Clinical and Experimental Research

**Supplementary Figure S2. ROC curves of molecular neurobiological biomarker domains**

Receiver operating characteristic curves illustrating diagnostic performance of molecular biomarkers across mechanistic domains: (A) neuroinflammatory activation (hs-CRP, IL-6), (B) muscle damage and matrix remodeling (CK-MM, MMP-9), (C) oxidative stress and neurotrophic regulation (MDA, BDNF, NGF) and (D) neuroglial activation (SP, GFAP). AUC = area under the curve.


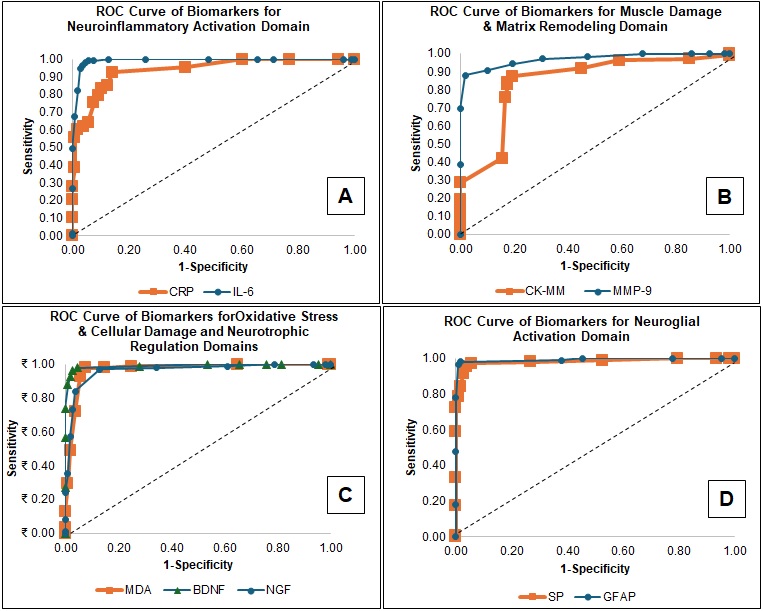

Supplement: Supplementary file 4 [file 56b8ebd82d2cb5a446f59a74.docx]
