# Supplementary material
Source: Research Square preprint supplement (doi:10.21203/rs.3.rs-9200044/v1)
Supplement: Supplementary file 5 [file 7b5ad3ff3d28541d9a40d823.docx]

**SUPPLEMENTARY MATERIALS**

**Title: Development of a multidomain neuromuscular aging clock integrating neurosensory dysfunction with molecular biomarkers**

**Authors:** Apurba Kumar Ganguly, Ph.D.*, Sudip Kumar Banerjee, Ph.D. Vidya Sagar GV, MD, Ph.D. Dinesh Kumar Singal, MD. and Anondeep Ganguly, PGDH.

*** Corresponding Author:** Apurba Kumar Ganguly, Ph.D.; Address: 7, Panditya Place, Kolkata-700029, India; Tel: +919830389616; Email: apurbaganguly15@gmail.com.

**Journal:** Aging Clinical and Experimental Research

**Supplementary Table S2. Diagnostic accuracy of molecular neurobiological biomarkers**

Molecular neurobiological biomarkers also demonstrated strong diagnostic performance for identifying neuromuscular dysfunction. Neurotrophic regulation markers exhibited the highest predictive performance, with BDNF showing an AUC of 0.995 and GFAP demonstrating near-perfect discrimination (AUC = 0.996). Biomarkers related to oxidative stress, inflammatory activation, and extracellular matrix remodeling also displayed high diagnostic accuracy. These results support the biological relevance of the molecular neurobiological framework underlying neuromuscular aging and reinforce the multidomain integration of biomarkers used to derive the composite biological neurofunctional index.

| **Biomarker** | **AUC (95%CI)** | **Youden's Index (%)** | **Sensitivity (%)** | **Specificity (%)** | **PPV (%)** | **NPV (%)** | **Accuracy (%)** | **Cut off value** |
| --- | --- | --- | --- | --- | --- | --- | --- | --- |
| **Neuroinflammatory Activation (NIA)** | | | | | | | | |
| **hs-CRP** | 0.950 (0.92 to 0.98) | 78.29 | 92.61 | 85.68 | 87.42 | 85.55 | 86.46 | 4 mg/ml |
| **IL-6** | 0.869 (0.82 to 0.91) | 67.89 | 87.42 | 80.48 | 82.42 | 83.41 | 82.91 | 120 U/L |
| **Muscle Damage &Matrix Remodeling (MDMR)** | | | | | | | | |
| **CK-MM** | 0.869 (0.82 to 0.92) | 67.89 | 87.42 | 80.48 | 82.42 | 83.41 | 82.91 | 120 U/L |
| **MMP-9** | 0.978 (0.95 to 0.99) | 86.11 | 87.96 | 98.15 | 100 | 76.6 | 84.72 | 137 ng/ml |
| **Oxidative Stress & Cellular Damage (OSCD)** | | | | | | | | |
| **MDA** | 0.980 (0.96 to 0.99) | 90.74 | 98.14 | 92.59 | 94.34 | 92.73 | 93.52 | 3 nmol/ml |
| **Neurotrophic Regulation (NTR)** | | | | | | | | |
| **BDNF** | 0.995 (0.98 to 1.00) | 93.52 | 98.15 | 95.37 | 97.2 | 96.33 | 96.76 | 24 ng/ml |
| **NGF** | 0.977 (0.96 to 0.99) | 84.26 | 97.22 | 87.04 | 95.79 | 85.95 | 90.28 | 80ng/ml |
| **Neuroglial Activation (NGA)** | | | | | | | | |
| **SP** | 0.989 (0.97 to 1.00) | 91.67 | 97.22 | 94.44 | 96.26 | 95.41 | 95.83 | 200 ng/ml |
| **GFAP** | 0.996 (0.98 to 1.00) | 96.31 | 98.17 | 98.15 | 99.05 | 96.4 | 97.69 | 0.30ng/mL |

Footnote: AUC = area under the ROC curve. Cut-off values optimized using Youden index. Biomarker units as indicated. Symptomatic (n = 108) vs. controls (n = 108). Abbreviations: hs-CRP = high-sensitivity C-reactive protein; IL-6 = interleukin-6; CK-MM = creatine kinase muscle isoform; MMP-9 = matrix metalloproteinase-9; MDA = malondialdehyde; BDNF = brain-derived neurotrophic factor; NGF = nerve growth factor; GFAP = glial fibrillary acidic protein.
