# Supplementary material
Source: Research Square preprint supplement (doi:10.21203/rs.3.rs-9200044/v1)
Supplement: Supplementary file 6 [file 93f8c29edfb8a6851941c2ae.docx]

**SUPPLEMENTARY MATERIALS**

**Title: Development of a multidomain neuromuscular aging clock integrating neurosensory dysfunction with molecular biomarkers**

**Authors:** Apurba Kumar Ganguly, Ph.D.*, Sudip Kumar Banerjee, Ph.D. Vidya Sagar GV, MD, Ph.D. Dinesh Kumar Singal, MD. and Anondeep Ganguly, PGDH.

*** Corresponding Author:** Apurba Kumar Ganguly, Ph.D.; Address: 7, Panditya Place, Kolkata-700029, India; Tel: +919830389616; Email: apurbaganguly15@gmail.com.

**Journal:** Aging Clinical and Experimental Research

**Supplementary Table S4. Construction of the Composite Biological Neurofunctional Index (CBNI)**

**S4A. Domain-level effect sizes contributing to CBNI**

| **Biological Domain** | **Biomarker** | **Unit** | **Symptomatic vs Control (Mean ± SD)** | **MD** | **SDpooled** | **Cohen's d** | **|d|** |
| --- | --- | --- | --- | --- | --- | --- | --- |
| **Neuroinflammatory Activation (NIA)** | CRP | mg/L | 6.25 ± 2.01 vs 3.20 ± 1.34 | 3.05 | 1.71 | 1.79 | 1.79 |
| IL-6 | pg/mL | 7.57 ± 0.89 vs 4.75 ± 2.12 | 2.82 | 1.63 | 1.73 | 1.73 |
| **Muscle Damage & Matrix Remodeling (MDMR)** | CK-MM | U/L | 172.38 ± 43.03 vs 107.05 ± 35.23 | 65.33 | 39.32 | 1.66 | 1.66 |
| MMP-9 | ng/mL | 146.99 ± 19.84 vs 78.98 ± 26.74 | 68.01 | 23.55 | 2.89 | 2.89 |
| **Oxidative Stress & Cellular Damage (OSCD)** | MDA | µmol/L | 4.28 ± 0.84 vs 2.82 ± 0.78 | 1.46 | 0.81 | 1.80 | 1.80 |
| **Neurotrophic Regulation (NTR)** | BDNF | ng/mL | 32.63 ± 3.36 vs 22.51 ± 4.20 | 10.12 | 3.80 | 2.66 | 2.66 |
| NGF | pg/mL | 107.78 ± 20.06 vs 59.35 ± 16.13 | 48.43 | 18.20 | 2.66 | 2.66 |
| **Neuroglial Activation (NGA)** | Substance P | pg/mL | 331.94 ± 60.74 vs 181.25 ± 41.88 | 150.69 | 52.17 | 2.89 | 2.89 |
| GFAP | ng/mL | 0.42 ± 0.06 vs 0.28 ± 0.07 | 0.14 | 0.06 | 2.26 | 2.26 |

**S4B. Domain-level weighting and calculation of the Composite Biological Neurofunctional Index (CBNI)**

|  | ∑ d | Wd | ∑d x Wd |
| --- | --- | --- | --- |
| Neuroinflammatory Activation (NIA) | 3.52 | 0.17 | 0.61 |
| Muscle Damage & Matrix Remodeling (MDMR) | 4.55 | 0.22 | 1.02 |
| Oxidative Stress & Cellular Damage (OSCD) | 1.8 | 0.09 | 0.16 |
| Neurotrophic Regulation (NTR) | 5.32 | 0.26 | 1.39 |
| Neuroglial Activation (NGA) | 5.15 | 0.25 | 1.31 |
|  | 20.34 | 1.00 | 4.48 |

Composite Biological Neurofunctional Index (CBNI) = ∑ (∑d x Wd) =4.48

Statistical formulation:

The Composite Biological Neurofunctional Index was calculated as:

CBNI = ∑(∑d × W<sub>d</sub>)

where:

d = standardized effect size (Cohen's d) for each biomarker

∑d = aggregated effect sizes within each biological domain

W<sub>d</sub> = normalized domain weight = (∑d<sub>domain</sub>) / (∑d<sub>total</sub>)

Footnote: Higher CBNI values indicate greater dysregulation across molecular pathways. Abbreviations: CBNI = Composite Biological Neurofunctional Index; hs-CRP = high-sensitivity C-reactive protein; IL-6 = interleukin-6; CK-MM = creatine kinase muscle isoform; MMP-9 = matrix metalloproteinase-9; MDA = malondialdehyde; BDNF = brain-derived neurotrophic factor; NGF = nerve growth factor; GFAP = glial fibrillary acidic protein.
