# Supplementary material
Source: Research Square preprint supplement (doi:10.21203/rs.3.rs-9200044/v1)
Supplement: Supplementary file 7 [file bbc7a8c26d551fbfe949710d.docx]

**SUPPLEMENTARY MATERIALS**

**Title: Development of a multidomain neuromuscular aging clock integrating neurosensory dysfunction with molecular biomarkers**

**Authors:** Apurba Kumar Ganguly, Ph.D.*, Sudip Kumar Banerjee, Ph.D. Vidya Sagar GV, MD, Ph.D. Dinesh Kumar Singal, MD. and Anondeep Ganguly, PGDH.

*** Corresponding Author:** Apurba Kumar Ganguly, Ph.D.; Address: 7, Panditya Place, Kolkata-700029, India; Tel: +919830389616; Email: apurbaganguly15@gmail.com.

**Journal:** Aging Clinical and Experimental Research

**Supplementary Table S3. Construction of the Composite Neuromuscular Dysfunction Index (CNDI)**

**S3A. Domain-level effect sizes contributing to CNDI**

| **Neurosensory Domain** | **Clinical Parameter** | **Symtomatic vs Control**  **(Mean ± SD)** | **MD** | **SDPooled** | **Cohen's d** | **|d|** |
| --- | --- | --- | --- | --- | --- | --- |
| **Nociceptive Pain Burden (NPB)** | Pain intensity | 2.69 ± 0.88 vs 0.67 ± 0.38 | 2.02 | 0.678 | 2.98 | 2.98 |
| Surface pain | 2.49 ± 0.79 vs 0.66 ± 0.47 | 1.84 | 0.650 | 2.82 | 2.82 |
| Deep pain | 2.28 ± 0.74 vs 0.75 ± 0.55 | 1.53 | 0.652 | 2.34 | 2.34 |
| **Neuropathic Sensory Dysfunction (NSD)** | Tingling/ pricking | 2.60 ± 0.97 vs 0.64 ± 0.80 | 1.96 | 0.889 | 2.20 | 2.20 |
| Sharpness sensation | 2.66 ± 1.05 vs 0.64 ± 0.60 | 2.02 | 0.855 | 2.36 | 2.36 |
| Dullness sensation | 2.61 ± 1.00 vs 0.49 ± 0.55 | 2.13 | 0.807 | 2.64 | 2.64 |
| **Thermal Sensory Alteration (TSA)** | Hot / burning sensation | 2.74 ± 1.00 vs 0.53 ± 0.66 | 2.21 | 0.847 | 2.61 | 2.61 |
| Cold sensation | 3.11 ± 1.05 vs 0.78 ± 0.81 | 2.33 | 0.938 | 2.49 | 2.49 |
| **Neurogenic Irritation Response (NIR)** | Itchingsensation | 3.14 ± 1.03 vs 0.73 ± 0.62 | 2.41 | 0.850 | 2.84 | 2.84 |

Values represent mean ± standard deviation for symptomatic participants with neuromuscular dysfunction (n = 108) and healthy controls (n = 108). Standardized effect sizes were calculated using Cohen’s d to quantify the magnitude of neurosensory dysfunction between groups.

All neurosensory parameters demonstrated very large standardized effect sizes (Cohen’s d range: 2.20–2.98), indicating substantial clinical neurosensory impairment in symptomatic individuals compared with healthy controls. These effect sizes contributed to the construction of the Composite Neuromuscular Dysfunction Index (CNDI) and were subsequently incorporated into the weighting structure of the Neuromuscular Aging Clock.

**S3B. Domain-level weighting and calculation of the Composite Neuromuscular Dysfunction Index (CNDI)**

|  | ∑ d | Wd | ∑d x Wd |
| --- | --- | --- | --- |
| Nociceptive Pain Burden (NPD) | 8.15 | 0.35 | 2.85 |
| Neuropathic Sensory Dysfunction (NSD) | 7.20 | 0.31 | 2.23 |
| Thermal Sensory Alteration (TSA) | 5.09 | 0.22 | 1.12 |
| Neurogenic Irritation Response (NIR) | 2.84 | 0.12 | 0.35 |
|  | 23.28 | 1.00 | 6.54 |

Composite Neuromuscular Dysfunction Index (CNDI) = ∑ (∑d x Wd) =6.54

Statistical formulation:

The Composite Neuromuscular Dysfunction Index was calculated as:

CNDI = ∑(∑d × W<sub>d</sub>)

where:

d = standardized effect size (Cohen's d) for each neurosensory parameter

∑d = aggregated effect sizes within each domain

W<sub>d</sub> = normalized domain weight = (∑d<sub>domain</sub>) / (∑d<sub>total</sub>)

Footnote: Higher CNDI values indicate greater multidimensional neurosensory impairment. Abbreviations: CNDI = Composite Neuromuscular Dysfunction Index.
