# Supplementary material
Source: Research Square preprint supplement (doi:10.21203/rs.3.rs-9200044/v1)

**SUPPLEMENTARY MATERIALS**

**Title: Development of a multidomain neuromuscular aging clock integrating neurosensory dysfunction with molecular biomarkers**

**Authors:** Apurba Kumar Ganguly, Ph.D.*, Sudip Kumar Banerjee, Ph.D. Vidya Sagar GV, MD, Ph.D. Dinesh Kumar Singal, MD. and Anondeep Ganguly, PGDH.

*** Corresponding Author:** Apurba Kumar Ganguly, Ph.D.; Address: 7, Panditya Place, Kolkata-700029, India; Tel: +919830389616; Email: apurbaganguly15@gmail.com.

**Journal:** Aging Clinical and Experimental Research

**Supplementary Figure S1. ROC curves of clinical neurosensory dysfunction domains**

Receiver operating characteristic curves demonstrating discriminatory performance of clinical neurosensory parameters for distinguishing symptomatic participants (n = 108) from healthy controls (n = 108). Domains: (A) nociceptive pain burden (pain intensity, surface pain, deep pain), (B) neuropathic sensory dysfunction (tingling/pricking, sharpness, dullness), (C) thermal sensory alteration (hot/burning, cold sensation) and neurogenic irritation response (itching). AUC = area under the curve.


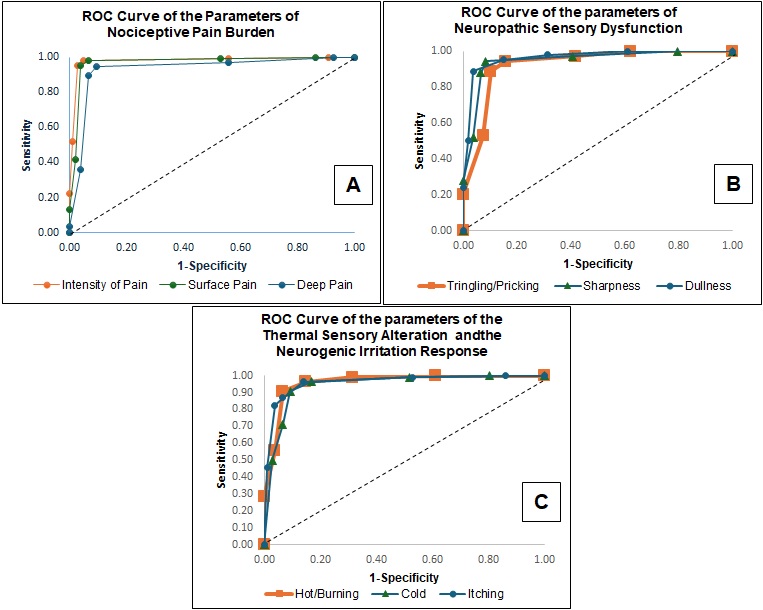

Supplement: Supplementary file 8 [file ca8e7f8dc195adc9b8f7f72d.docx]
