# Supplementary material
Source: Research Square preprint supplement (doi:10.21203/rs.3.rs-9200044/v1)
Supplement: Supplementary file 9 [file da9571c970241635d7965e56.docx]

**SUPPLEMENTARY MATERIALS**

**Title: Development of a multidomain neuromuscular aging clock integrating neurosensory dysfunction with molecular biomarkers**

**Authors:** Apurba Kumar Ganguly, Ph.D.*, Sudip Kumar Banerjee, Ph.D. Vidya Sagar GV, MD, Ph.D. Dinesh Kumar Singal, MD. and Anondeep Ganguly, PGDH.

*** Corresponding Author:** Apurba Kumar Ganguly, Ph.D.; Address: 7, Panditya Place, Kolkata-700029, India; Tel: +919830389616; Email: apurbaganguly15@gmail.com.

**Journal:** Aging Clinical and Experimental Research

**Supplementary Figure S4. Domain-level contributions to CNDI and CBNI**


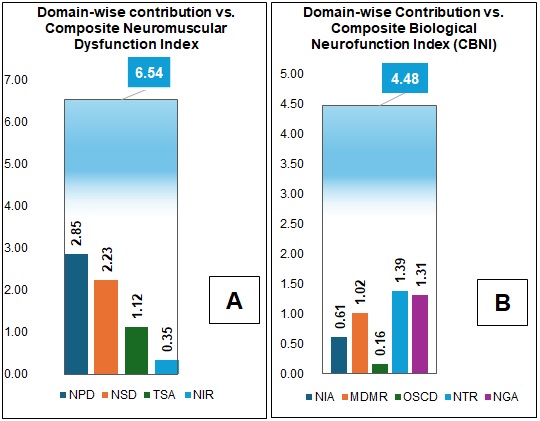


Proportional contributions of clinical neurosensory domains to the Composite Neuromuscular Dysfunction Index (CNDI). (B) Proportional contributions of molecular biomarker domains to the Composite Biological Neurofunctional Index (CBNI). Values represent weighted contributions (∑d × W<sub>d</sub>) normalized to total index score.
