# Supplementary material
Source: Research Square preprint supplement (doi:10.21203/rs.3.rs-9200044/v1)
Supplement: Supplementary file 10 [file e36eba98f822c03ef5d1ef27.docx]

**SUPPLEMENTARY MATERIALS**

**Title: Development of a multidomain neuromuscular aging clock integrating neurosensory dysfunction with molecular biomarkers**

**Authors:** Apurba Kumar Ganguly, Ph.D.*, Sudip Kumar Banerjee, Ph.D. Vidya Sagar GV, MD, Ph.D. Dinesh Kumar Singal, MD. and Anondeep Ganguly, PGDH.

*** Corresponding Author:** Apurba Kumar Ganguly, Ph.D.; Address: 7, Panditya Place, Kolkata-700029, India; Tel: +919830389616; Email: apurbaganguly15@gmail.com.

**Journal:** Aging Clinical and Experimental Research

**Supplementary Figure S5. Neuromuscular biological age estimation**


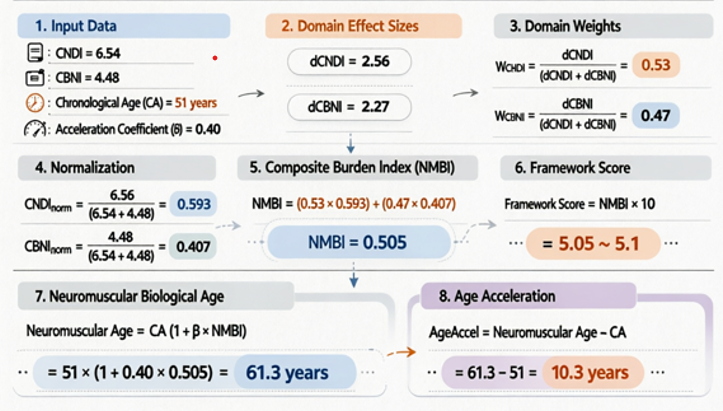


Schematic illustrating calculation of neuromuscular biological age using the Neuromuscular Aging Clock (NAC):

Neuromuscular Age = CA × (1 + β × NMBI)

where CA = chronological age, β = acceleration coefficient (0.40), NMBI = Neuromuscular Biological Age Index (weighted sum of normalized CNDI and CBNI). Age acceleration = Neuromuscular Age − CA.
